# Supplementary material for: Inhibition of Aflatoxin Production in Aspergillus flavus by a Klebsiella sp. and Its Metabolite Cyclo(l-Ala-Gly)
Source: MDPI journal article supplement (doi:10.3390/toxins16030141), 2024-03-08
Supplement: s1 [file s1]

# Supplementary Materials: Inhibition of Aflatoxin Production in *Aspergillus flavus* by a *Klebsiella* sp. and Its Metabolite Cyclo(L-Ala-Gly)

Shohei Sakuda, Masaki Sunaoka, Maho Terada, Ayaka Sakoda, Natsumi Ishijima, Noriko Hakoshima, Kenichi Uchida, Hirofumi Enomoto and Tomohiro Furukawa

## CONTENTS

### Method

*Analysis of mycelial weight*

### Figures

**Figure S1.** Alignment of the partial sequences of 16S rDNA from the strain KTTM (Query) and *Klebsiella aerogenes* NBRC 13534 (Sbjct)

**Figure S2.** <sup>1</sup>H NMR spectrum of the active component in DMSO-*d*<sub>6</sub> (500 MHz)

**Figure S3.** <sup>13</sup>C NMR spectrum of the active component in DMSO-*d*<sub>6</sub> (125 MHz)

**Figure S4.** Effect of the strain KTTM on the growth of *A. flavus* on peanuts

**Figure S5.** Effects of cyclo(L-Ala-Gly) and related compounds on *A. flavus* glutathione-S-transferase activity

### Method

*Analysis of the mycelial weight*

Cyclo(L-Ala-Gly) water solution (100 µL), passed through a 0.25 µm filter, was added to potato dextrose liquid medium (1.9 mL) in a well of a microplate (24 wells). A spore suspension of *A. flavus* (5 µL,  $1.1 \times 10^5$  CFU/µL) was inoculated into the medium and incubated statically for 4 days at 25 °C. The mycelia in each well were collected in a 1.5 mL microtube. After drying the mycelia at 50 °C for 4 days, the mycelial weights were calculated by subtracting the weight of a 1.5 mL microtube without mycelia from the total weight.

|       |     |                                                               |     |
|-------|-----|---------------------------------------------------------------|-----|
| Query | 1   | ATTGAACGCTGGCGGCAGGCCTAACACATGCAAGTCGAGCGGTAR                 | 60  |
| Sbjct | 1   | ATTGAACGCTGGCGGCAGGCCTAACACATGCAAGTCGAGCGGTAG                 | 60  |
| Query | 61  | CTCGGGTGACGAGCGGCGGACGGGTGAGTAATGTCTGGGAAACTGCCTGATGGAGGGGGA  | 120 |
| Sbjct | 61  | CTCGGGTGACGAGCGGCGGACGGGTGAGTAATGTCTGGGAAACTGCCTGATGGAGGGGGA  | 120 |
| Query | 121 | TAACTACTGGAAACGGTAGCTAATACCGCATAACGTCGCAAGACCAAAGTGGGGGACCTT  | 180 |
| Sbjct | 121 | TAACTACTGGAAACGGTAGCTAATACCGCATAACGTCGCAAGACCAAAGTGGGGGACCTT  | 180 |
| Query | 181 | CGGGCCTCATGCCATCAGATGTGCCCAGATGGGATTAGCTAGTAGGTGGGGTAATGGCTC  | 240 |
| Sbjct | 181 | CGGGCCTCATGCCATCAGATGTGCCCAGATGGGATTAGCTAGTAGGTGGGGTAATGGCTC  | 240 |
| Query | 241 | ACCTAGGCGACGATCCCTAGCTGGTCTGAGAGGATGACCAGCCACACTGGAACTGAGACA  | 300 |
| Sbjct | 241 | ACCTAGGCGACGATCCCTAGCTGGTCTGAGAGGATGACCAGCCACACTGGAACTGAGACA  | 300 |
| Query | 301 | CGGTCCAGACTCCTACGGGAGGCAGCAGTGGGGAATATTGCACAATGGGCGCAAGCCTGA  | 360 |
| Sbjct | 301 | CGGTCCAGACTCCTACGGGAGGCAGCAGTGGGGAATATTGCACAATGGGCGCAAGCCTGA  | 360 |
| Query | 361 | TGCAGCCATGCCGCGTGTATGAAGAAGGCCTTCGGGTTGTAAAGTACTTTTCAGCGAGGAG | 420 |
| Sbjct | 361 | TGCAGCCATGCCGCGTGTATGAAGAAGGCCTTCGGGTTGTAAAGTACTTTTCAGCGAGGAG | 420 |
| Query | 421 | GAAGGCR                                                       | 480 |
| Sbjct | 421 | GAAGGCG                                                       | 480 |
| Query | 481 | ACTCCGTGCCAGCAGCCGCGGTAATACGGAGGGTGCAAGCGTTAATCGGAATTACTGGGC  | 540 |
| Sbjct | 481 | ACTCCGTGCCAGCAGCCGCGGTAATACGGAGGGTGCAAGCGTTAATCGGAATTACTGGGC  | 540 |
| Query | 541 | GTAAGCGCACGCAGGCGGTCTGTCAAGTCGGATGTGAAATCCCCGGGCTCAACCTGGGA   | 600 |
| Sbjct | 541 | GTAAGCGCACGCAGGCGGTCTGTCAAGTCGGATGTGAAATCCCCGGGCTCAACCTGGGA   | 600 |
| Query | 601 | ACTGCATTGCAAACTGGCAGGCTAGAGTCTTGTAGAGGGGGGTAGAATTCAGGTGTAGC   | 660 |
| Sbjct | 601 | ACTGCATTGCAAACTGGCAGGCTAGAGTCTTGTAGAGGGGGGTAGAATTCAGGTGTAGC   | 660 |
| Query | 661 | GGTGAAATGCGTAGAGATCTGGAGGAATACCGGTGGCGAAGGCGGCCCCCTGGACAAAGA  | 720 |
| Sbjct | 661 | GGTGAAATGCGTAGAGATCTGGAGGAATACCGGTGGCGAAGGCGGCCCCCTGGACAAAGA  | 720 |
| Query | 721 | CTGACGCTCAGGTGCGAAAGCGTGGGGAGCAAACAGGATTAGATACCCTGGTAGTCCACG  | 780 |
| Sbjct | 721 | CTGACGCTCAGGTGCGAAAGCGTGGGGAGCAAACAGGATTAGATACCCTGGTAGTCCACG  | 780 |

**Figure S1.** Alignment of the partial sequences of 16S rDNA from the strain KTTM (Query) and *Klebsiella aerogenes* NBRC 13534 (Sbjct)

|       |      |                                                                            |      |
|-------|------|----------------------------------------------------------------------------|------|
| Query | 781  | CCGTAAACGATGTCGACTTGGAGGTTGTGCCCTTGAGGCGTGGCTTCCGGAGCTAACGCG               | 840  |
|       |      |                                                                            |      |
| Sbjct | 781  | CCGTAAACGATGTCGACTTGGAGGTTGTGCCCTTGAGGCGTGGCTTCCGGAGCTAACGCG               | 840  |
| Query | 841  | TTAAGTCGACCGCCTGGGGAGTACGGCCGCAAGGTTAAACTCAAATGAATTGACGGGGG                | 900  |
|       |      |                                                                            |      |
| Sbjct | 841  | TTAAGTCGACCGCCTGGGGAGTACGGCCGCAAGGTTAAACTCAAATGAATTGACGGGGG                | 900  |
| Query | 901  | CCCGCACAAAGCGGTGGAGCATGTGGTTTAATTCGATGCAACGCGAAGAACCTTACCTACT              | 960  |
|       |      |                                                                            |      |
| Sbjct | 901  | CCCGCACAAAGCGGTGGAGCATGTGGTTTAATTCGATGCAACGCGAAGAACCTTACCTACT              | 960  |
| Query | 961  | CTTGACATCCAGAGAACTTAGCAGAGATGCTTTGGTGCCTTCGGGAACCTCTGAGACAGGT              | 1020 |
|       |      |                                                                            |      |
| Sbjct | 961  | CTTGACATCCAGAGAACTTAGCAGAGATGCTTTGGTGCCTTCGGGAACCTCTGAGACAGGT              | 1020 |
| Query | 1021 | GCTGCATGGCTGTCGTGAGCTCGTGTTGTGAAATGTTGGGTAAAGTCCCGCAACGAGCGC               | 1080 |
|       |      |                                                                            |      |
| Sbjct | 1021 | GCTGCATGGCTGTCGTGAGCTCGTGTTGTGAAATGTTGGGTAAAGTCCCGCAACGAGCGC               | 1080 |
| Query | 1081 | AACCCCTATCCTTTGTTGCCAGCGGT <sup>YM</sup> GGCCGGGAACCTCAAAGGAGACTGCCAGTGATA | 1140 |
|       |      |                                                                            |      |
| Sbjct | 1081 | AACCCCTATCCTTTGTTGCCAGCGGT <sup>NC</sup> GGCCGGGAACCTCAAAGGAGACTGCCAGTGATA | 1140 |
| Query | 1141 | AACTGGAGGAAGGTGGGGATGACGTCAAGTCATCATGGCCCTTACGAGTAGGGCTACACA               | 1200 |
|       |      |                                                                            |      |
| Sbjct | 1141 | AACTGGAGGAAGGTGGGGATGACGTCAAGTCATCATGGCCCTTACGAGTAGGGCTACACA               | 1200 |
| Query | 1201 | CGTGCTACAATGGCATATACAAAGAGAAGCGACCTCGCGAGAGCAAGCGGACCTCATAAA               | 1260 |
|       |      |                                                                            |      |
| Sbjct | 1201 | CGTGCTACAATGGCATATACAAAGAGAAGCGACCTCGCGAGAGCAAGCGGACCTCATAAA               | 1260 |
| Query | 1261 | GTATGTCGTAGTCCGGATTGGAGTCTGCAACTCGACTCCATGAAGTCGGAATCGCTAGTA               | 1320 |
|       |      |                                                                            |      |
| Sbjct | 1261 | GTATGTCGTAGTCCGGATTGGAGTCTGCAACTCGACTCCATGAAGTCGGAATCGCTAGTA               | 1320 |
| Query | 1321 | ATCGTAGATCAGAATGCTACGGTGAATACGTTCCCGGCCTTGTACACACCGCCCGTCAC                | 1380 |
|       |      |                                                                            |      |
| Sbjct | 1321 | ATCGTAGATCAGAATGCTACGGTGAATACGTTCCCGGCCTTGTACACACCGCCCGTCAC                | 1380 |
| Query | 1381 | ACCATGGGAGTGGGTTGCAAAAGAAGTAGGTAGCTTAACCTTCGGGAGGGCGCTTACCAC               | 1440 |
|       |      |                                                                            |      |
| Sbjct | 1381 | ACCATGGGAGTGGGTTGCAAAAGAAGTAGGTAGCTTAACCTTCGGGAGGGCGCTTACCAC               | 1440 |
| Query | 1441 | TTTGTGATTCATGACTGGGGTGAAG                                                  | 1465 |
|       |      |                                                                            |      |
| Sbjct | 1441 | TTTGTGATTCATGACTGGGGTGAAG                                                  | 1465 |

**Figure S1.** (continued) Alignment of the partial sequences of 16S rDNA from the strain KTTM (Query) and *Klebsiella aerogenes* NBRC 13534 (Sbjct)

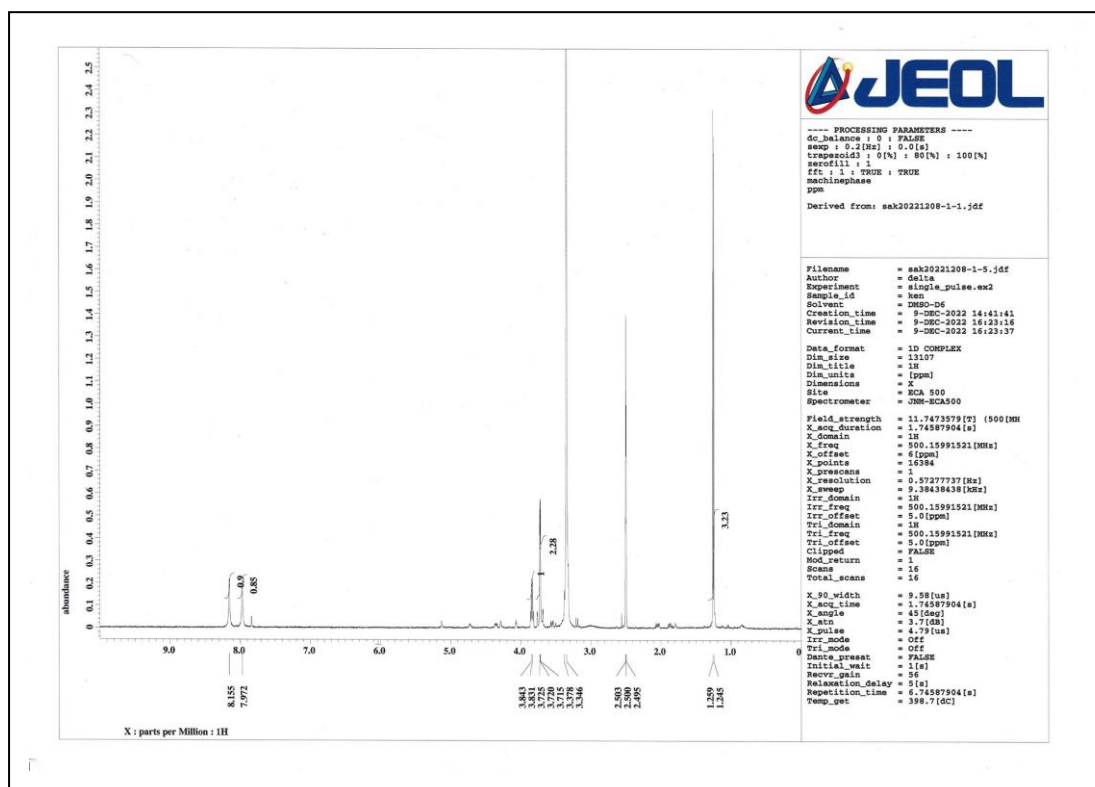

**Figure S2.**  $^1\text{H}$  NMR spectrum of the active component in  $\text{DMSO-}d_6$  (500 MHz)

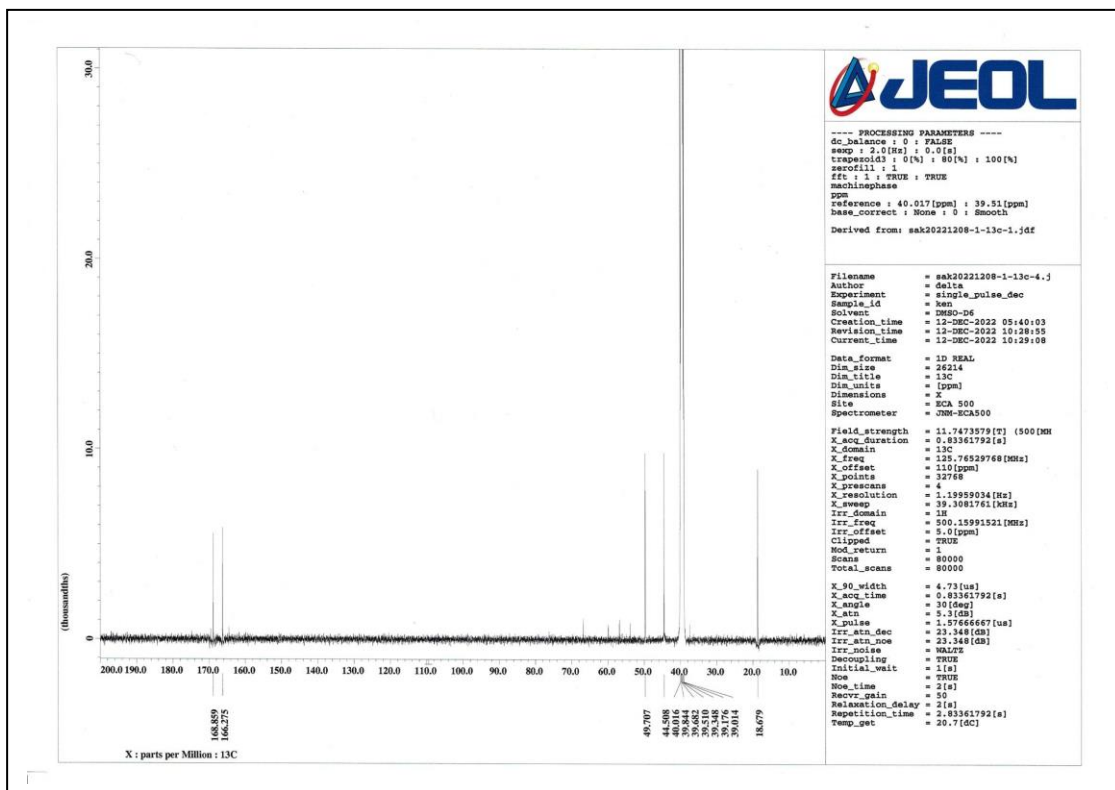

**Figure S3.**  $^{13}\text{C}$  NMR spectrum of the active component in  $\text{DMSO-}d_6$  (125 MHz)



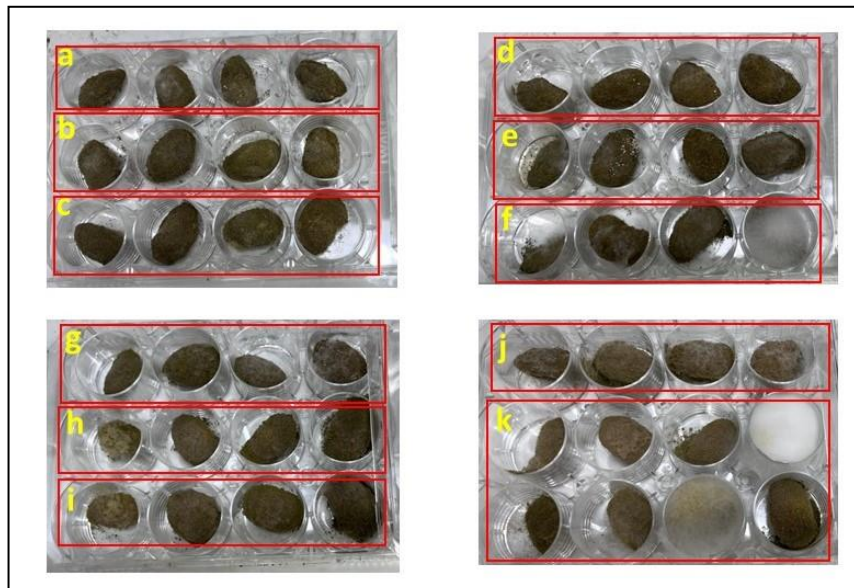

**Figure S4.** Effect of the strain KTTM on the growth of *A. flavus* on peanuts. Autoclaved law peanuts without shells and skins were dipped for a few seconds in the culture broth of the strain KTTM (a,  $6.2 \times 10^8$  cells/mL) or a 10-time dilution series of dilutions of the culture broth (b,  $6.2 \times 10^7$  cells/mL; c,  $6.2 \times 10^6$  cells/mL; d,  $6.2 \times 10^5$  cells/mL; e,  $6.2 \times 10^4$  cells/mL; f,  $6.2 \times 10^3$  cells/mL; g,  $6.2 \times 10^2$  cells/mL; h,  $6.2 \times 10$  cells/mL; i, 6.2 cells/mL; and j,  $<1$  cell/mL), with a liquid Bennet medium used as the control (k), and incubated at 25 °C for 30 days.

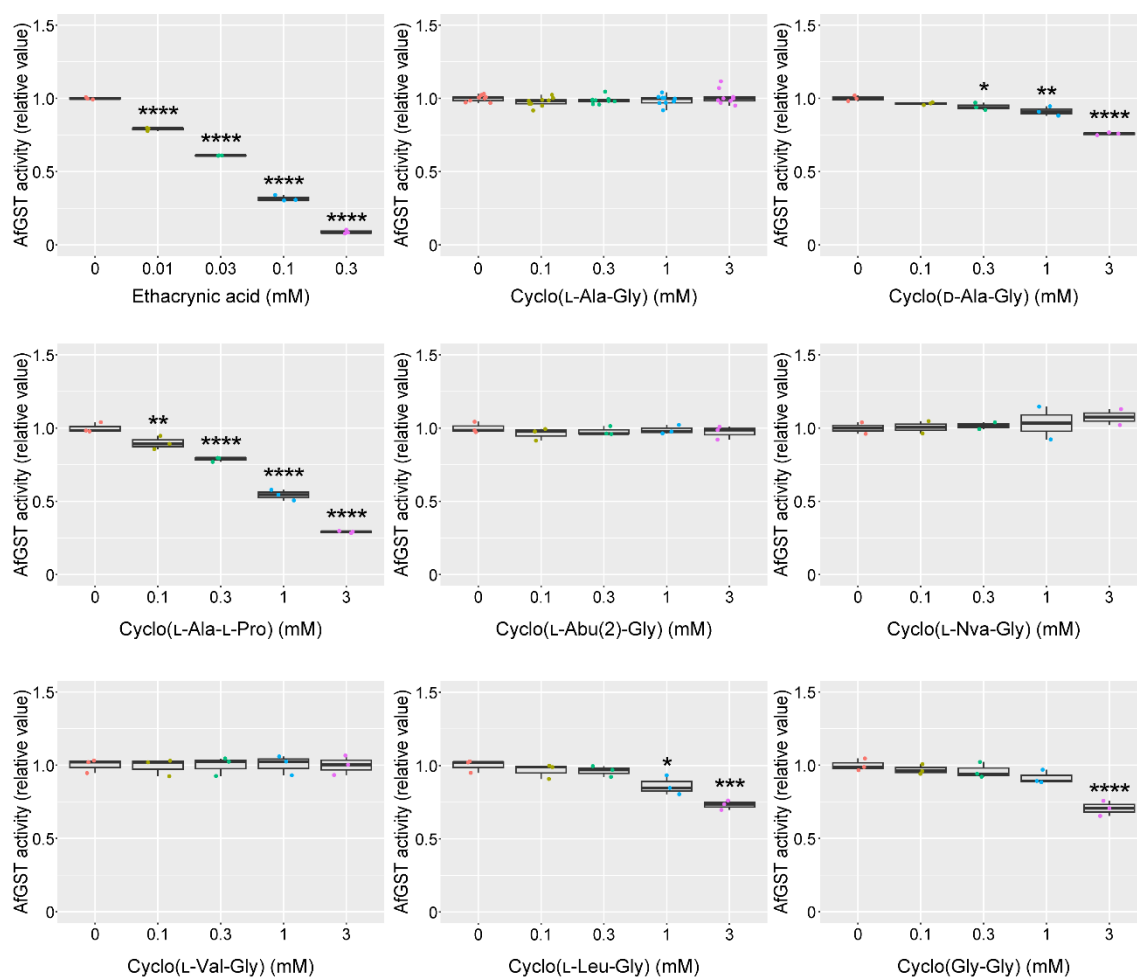

**Figure S5.** Effects of cyclo(L-Ala-Gly) and related compounds on *A. flavus* glutathione-S-transferase activity  
 Boxplots of the relative activity of *A. flavus* glutathione-S-transferase (AfGST) when treated with ethacrynic acid and diketopiperazines. The colored dots indicate individual values.  $n = 4$ . \* $p < 0.05$ , \*\* $p < 0.01$ , \*\*\* $p < 0.001$ , and \*\*\*\* $p < 0.0001$  versus no added control, ordinary one-way ANOVA followed by Dunnett's test.
